# Supplementary material for: The epigenetic control of E-box and Myc-dependent chromatin modifications regulate the licensing of lamin B2 origin during cell cycle
Source: PubMed Central journal article supplement — Nucleic Acids Res. 2012 Jul 5;40(18):9021–35. doi: 10.1093/nar/gks617 (PMC3467044; doi:10.1093/nar/gks617), 2012-07-05
Supplement: supp_gks617_nar-02954-x-2011-File011.pdf [file supp_gks617_nar-02954-x-2011-File011.pdf]

## Supplementary Tables

**Supplementary Table S1** Oligonucleotide primers used for MNase CHART-PCR, ChIP-qPCR and Nascent strand abundance assay

| Primers          | Sequence                                                                  | Map positions (bp)     | Product length (bp) |
|------------------|---------------------------------------------------------------------------|------------------------|---------------------|
| LB2 ORI          | F-5' GACTGGAAACTTTTTGTAC 3'<br>R-5' GTGGAGGGATCTTTCTTAGACATC 3'           | 3937-3956<br>4070-4047 | 134                 |
| E-box            | F-5' AACAGGACCCAGGCGATG 3'<br>R-5' <b>CGGAATTCC</b> CGTCTATACAGCGTGTTC 3' | 4110-4127<br>4240-4221 | 131                 |
| non-ORI<br>LB2-P | F-5' CCCACTCCTCATCTCACCAT 3'<br>R-5' ACGCCTGGATTCTGAATTTG 3'              | 1467-1486<br>1682-1663 | 216                 |

Sequence of oligonucleotide primers and their map positions according to the human Lamin B2 (LAMB2) gene and ppv1 (TIMM 13) gene sequence (Gene bank accession no. M94363). Letters in bold are ectopic overhangs attached for introducing restriction sites (underlined sequence). MCM4 ORI primer and MCM4 non-ORI primer used in ChIP-qPCR and nascent strand abundance assay were described elsewhere as primer sets of UPR-F, UPR-R2 and EX7-F, EX7-R respectively (60).

**Supplementary Table S2** Oligonucleotide primers used for RT-qPCR

| Primers | Sequence                                                     | Map positions (bp)     | Product length (bp) |
|---------|--------------------------------------------------------------|------------------------|---------------------|
| TIMM 13 | F-5' AATGGAGCAGGTGAAAGTGC 3'<br>R-5' GAGTTGTAGGCGCGAGACAC 3' | 4680-4699<br>5166-5147 | 199*                |
| ODC     | F-5' ATGTTGCATCAGCTTTCAC 3'<br>R-5' TCCATAGACGCCATCATTC 3'   | 836-854<br>972-954     | 133                 |
| GAPDH   | F-5' CGACCACTTTGTCAAGCTCA 3'<br>R-5' AGGGGTCTACATGGCAACTG 3' | 1014-1033<br>1241-1222 | 228                 |

Sequence of oligonucleotide primers used in RT-qPCR. The map positions of TIMM 13 primers are according to the human Lamin B2 (LAMB2) gene and ppv1 (TIMM 13) gene sequence (Gene bank accession no. M94363). Sequence of ODC oligonucleotide primers are designed for the map positions of *Homo sapiens* ornithine decarboxylase 1 (ODC1) mRNA (Gene bank accession no. NM\_002539.1). GAPDH map position is according to the *Homo sapiens* Glyceraldehyde-3-phosphate dehydrogenase (GAPDH) mRNA sequence (Gene bank accession no. NM\_002046). \*, indicates the 199 bp cDNA product excluding the introns located between the map positions of 4680 – 5166.

**Supplementary Table S3** Oligonucleotide primers used for EMSA

| Primers            | Sequence                                                                                   |
|--------------------|--------------------------------------------------------------------------------------------|
| Consensus<br>E-box | F-5' GGAAGCAGACC <u>CACGTGGTCTGCTTCC</u> 3'<br>R-5' GGAAGCAGACC <u>CACGTGGTCTGCTTCC</u> 3' |
| lamin B2<br>E-box  | F-5' GACTCTTCGT <u>CACGTG</u> ATGCGACCGG 3'<br>R-5' CCGGTGCGAT <u>CACGTG</u> ACGAAGAGTC 3' |

Underlined sequences are core E-box element of c-Myc binding site. Upon DMS treatment the E-box was methylated (mEbox – CA<sup>m</sup>CGTG).

**Supplementary Table S4** List of human replication origins possessing E-box element

| Origins    |           |           | Position of E-box        |                                          |
|------------|-----------|-----------|--------------------------|------------------------------------------|
| Chromosome | Beginning | End       | CACGTG                   | GTGCAC                                   |
| chr1       | 148244302 | 148246331 |                          | 148,246,043                              |
| chr1       | 148258507 | 148260234 |                          | 148,258,749                              |
| chr1       | 148296747 | 148298101 | 148,296,758              |                                          |
| chr2       | 118505924 | 118507071 |                          | 118,506,170; 118,506,630                 |
| chr2       | 220188829 | 220191429 | 220,189,106              |                                          |
| chr2       | 220228419 | 220230263 | 220,230,228              |                                          |
| chr2       | 220242014 | 220245496 |                          | 220,242,849                              |
| chr2       | 220336089 | 220337258 |                          | 220,336,875                              |
| chr2       | 220541427 | 220543128 |                          | 220,542,648                              |
| chr2       | 234486579 | 234487948 |                          | 234,486,670; 234,487,511                 |
| chr2       | 234740455 | 234741601 | 234,741,164              |                                          |
| chr5       | 55873281  | 55874378  | 55,873,964               | 55,874,102                               |
| chr5       | 56085418  | 56086517  | 56,086,155               |                                          |
| chr5       | 56119168  | 56120680  |                          | 56,119,285                               |
| chr5       | 56241199  | 56242625  | 56,241,865               |                                          |
| chr5       | 131571851 | 131573644 | 131,573,154              |                                          |
| chr5       | 131860038 | 131861573 |                          | 131,860,936                              |
| chr5       | 132025755 | 132026955 | 132,026,459; 132,026,929 | 132,026,573                              |
| chr5       | 132048184 | 132049426 | 132,049,285              | 132,049,280                              |
| chr5       | 132151529 | 132152659 |                          | 132,151,546                              |
| chr5       | 141999954 | 142001505 |                          | 142,000,152; 142,000,241;<br>142,000,649 |
| chr5       | 142078249 | 142081176 | 142,079,020              |                                          |
| chr5       | 142176213 | 142178174 | 142,176,736              |                                          |
| chr6       | 41585098  | 41586734  |                          | 41,585,657; 41,585,710                   |
| chr6       | 41599804  | 41601172  | 41,600,474               |                                          |
| chr6       | 41854596  | 41855697  |                          | 41,854,775                               |
| chr6       | 74108528  | 74110397  | 74,108,933               |                                          |
| chr6       | 108711089 | 108712249 |                          | 108,712,132                              |

|       |           |           |                                          |                                                                       |
|-------|-----------|-----------|------------------------------------------|-----------------------------------------------------------------------|
| chr7  | 26922861  | 26924734  | 26,923,581                               |                                                                       |
| chr7  | 26952545  | 26954275  | 26,953,152                               |                                                                       |
| chr7  | 27056729  | 27057891  |                                          | 27,057,583                                                            |
| chr7  | 89478648  | 89479835  |                                          | 89,478,840; 89,478,887                                                |
| chr7  | 89677540  | 89679141  | 89,678,998                               | 89,678,067; 89,679,003                                                |
| chr7  | 89870257  | 89871631  | 89,871,427                               |                                                                       |
| chr7  | 90037675  | 90039130  |                                          | 90,037,749                                                            |
| chr7  | 90089748  | 90091313  | 90,089,986                               |                                                                       |
| chr7  | 114318566 | 114319629 |                                          | 114,318,735                                                           |
| chr7  | 115760088 | 115761361 | 115,761,081                              | 115,760,367; 115,761,295                                              |
| chr7  | 116713437 | 116715501 | 116,714,185                              |                                                                       |
| chr7  | 116799265 | 116800441 |                                          | 116,800,307                                                           |
| chr7  | 117025196 | 117026369 |                                          | 117,026,161                                                           |
| chr7  | 126581134 | 126582490 | 126,581,655                              |                                                                       |
| chr7  | 126626567 | 126628059 | 126,627,342                              |                                                                       |
| chr7  | 126698956 | 126700072 |                                          | 126,699,211                                                           |
| chr8  | 119374375 | 119375434 |                                          | 119,374,440                                                           |
| chr9  | 128878320 | 128879939 |                                          | 128,879,083                                                           |
| chr9  | 128950230 | 128954769 |                                          | 128,952,874                                                           |
| chr9  | 128982248 | 128985348 | 128,983,760                              | 128,982,588                                                           |
| chr9  | 129022541 | 129024126 | 129,023,448                              | 129,023,764                                                           |
| chr9  | 129125826 | 129127790 | 129,125,858; 129,125,967;<br>129,127,062 | 129,126,628; 129,127,059                                              |
| chr9  | 129178491 | 129180032 |                                          | 129,179,811                                                           |
| chr9  | 129193266 | 129195682 | 129,194,195                              |                                                                       |
| chr9  | 129220258 | 129221445 | 129,220,528; 129,221,431;<br>129,221,437 | 129,221,434                                                           |
| chr9  | 129253902 | 129256230 |                                          | 129,254,415; 129,254,592                                              |
| chr11 | 64167296  | 64168971  | 64,168,011; 64,168,055                   | 64,168,014; 64,168,190;<br>64,168,290                                 |
| chr11 | 64289674  | 64293005  | 64,292,079                               | 64,289,731; 64,289,749                                                |
| chr11 | 64302035  | 64303808  |                                          | 64,303,658                                                            |
| chr11 | 64367486  | 64368648  |                                          | 64,368,167                                                            |
| chr11 | 64412337  | 64413999  | 64,412,385; 64,413,855                   | 64,413,490                                                            |
| chr11 | 64438527  | 64439948  | 64,438,663                               |                                                                       |
| chr11 | 130855483 | 130856606 | 130,855,600                              |                                                                       |
| chr13 | 112428205 | 112429622 | 112,428,561                              |                                                                       |
| chr13 | 112433768 | 112434909 | 112,434,155                              | 112,434,152                                                           |
| chr13 | 112530134 | 112531863 |                                          | 112,531,306; 112,531,326                                              |
| chr13 | 112561443 | 112562786 | 112,561,607                              | 112,561,604                                                           |
| chr13 | 112596565 | 112597931 |                                          | 112,597,900                                                           |
| chr13 | 112606307 | 112607524 |                                          | 112,606,643                                                           |
| chr13 | 112612988 | 112614632 | 112,614,353                              |                                                                       |
| chr13 | 112668983 | 112670626 |                                          | 112,670,006; 112,670,094;<br>112,670,154; 112,670,274;<br>112,670,314 |
| chr13 | 112703946 | 112705845 | 112,704,980                              | 112,704,506                                                           |
| chr13 | 112811287 | 112812598 | 112,811,809                              |                                                                       |
| chr14 | 98486278  | 98487757  |                                          | 98,486,712                                                            |

|       |           |           |                                          |                        |
|-------|-----------|-----------|------------------------------------------|------------------------|
| chr14 | 98724314  | 98725645  | 98,725,559                               |                        |
| chr14 | 98767316  | 98769158  | 98,767,976; 98,768,682                   |                        |
| chr14 | 98808316  | 98809543  | 98,808,531; 98,809,026;<br>98,809,204    |                        |
| chr14 | 98881859  | 98883202  |                                          | 98,881,927; 98,882,652 |
| chr15 | 41735285  | 41736157  |                                          | 41,735,450             |
| chr16 | 47415     | 48530     | 47,904                                   | 47,901                 |
| chr16 | 128359    | 129221    | 128,642                                  |                        |
| chr16 | 265752    | 267214    | 266,614                                  | 266,921                |
| chr16 | 343083    | 344285    | 343,331                                  |                        |
| chr16 | 353862    | 355393    | 354,732                                  |                        |
| chr16 | 371926    | 373475    | 372,076; 372,105                         |                        |
| chr16 | 391235    | 392389    | 392,111                                  |                        |
| chr16 | 458042    | 459289    | 458,769                                  |                        |
| chr18 | 24064501  | 24065770  |                                          | 24,064,758             |
| chr19 | 59077897  | 59080362  | 59,078,338                               |                        |
| chr19 | 59093470  | 59095647  | 59,095,085                               |                        |
| chr19 | 59174913  | 59178718  | 59,175,121                               |                        |
| chr19 | 59225201  | 59226338  | 59,225,309; 59,225,911;<br>59,226,173    |                        |
| chr19 | 59340003  | 59341368  | 59,341,197                               |                        |
| chr19 | 59357776  | 59359107  | 59,357,966                               |                        |
| chr19 | 59588883  | 59590167  |                                          | 59,588,892             |
| chr20 | 33520581  | 33521619  | 33,520,881                               |                        |
| chr20 | 33604647  | 33606279  | 33,605,235                               |                        |
| chr21 | 32924855  | 32926140  |                                          | 32,925,073             |
| chr21 | 33314649  | 33316910  | 33,316,719; 33,315,366                   | 33,315,223             |
| chr21 | 33321658  | 33323457  | 33,321,956; 33,323,051;<br>33,323,141    | 33,321,689             |
| chr21 | 33371196  | 33372523  |                                          | 33,371,847             |
| chr21 | 33773906  | 33775426  |                                          | 33,774,178             |
| chr21 | 39377239  | 39378501  |                                          | 39,377,748             |
| chr22 | 30349689  | 30350809  |                                          | 30,349,983             |
| chr22 | 30896070  | 30897269  |                                          | 30,896,185             |
| chr22 | 31030409  | 31031414  | 31,030,978                               | 31,031,026             |
| chr22 | 31156785  | 31158209  | 31,157,562                               |                        |
| chr22 | 31195329  | 31197371  |                                          | 31,195,648             |
| chr22 | 31366116  | 31367680  | 31,366,480                               |                        |
| chr22 | 31437500  | 31439348  |                                          | 31,438,454             |
| chr22 | 31530713  | 31531675  | 31,531,538                               |                        |
| chrX  | 122624067 | 122625387 |                                          | 122,624,861            |
| chrX  | 152662042 | 152663313 |                                          | 152,662,816            |
| chrX  | 152689689 | 152691828 | 152,691,296                              | 152,691,299            |
| chrX  | 152704242 | 152705388 |                                          | 152,704,960            |
| chrX  | 152721163 | 152722370 | 152,721,691                              | 152,721,365            |
| chrX  | 153081356 | 153082612 | 153,081,370; 153,082,247;<br>153,082,591 |                        |
| chrX  | 153123710 | 153124807 |                                          | 153,124,666            |

|      |           |           |             |             |
|------|-----------|-----------|-------------|-------------|
| chrX | 153130060 | 153131533 |             | 153,130,742 |
| chrX | 153249941 | 153251354 | 153,250,430 |             |
| chrX | 153327230 | 153328684 | 153,328,528 |             |
| chrX | 153338595 | 153339968 | 153,339,920 | 153,339,401 |
| chrX | 153818861 | 153819900 |             | 153,818,886 |

Origins possessing E-box elements are listed and the position of E-box is denoted. The origin sequence mentioned here can be retrieved from the following URL.  
(<http://genome.ucsc.edu/ENCODE/encode.hg17.html>).

### **Supplementary Figure legends**

**Supplementary Figure S1.** Flow cytometry of HEK293 cells and kinetics of Myc-ER recruitment to lamin B2 origin by Tam induction. **(A and B)** HEK293 cells, either arrested at G<sub>0</sub> (serum starvation) or serum stimulated for indicated time points were processed either for Flow cytometry to show the distribution of cells in different phases of cell cycle **(A)** or for western blotting to show the protein levels of cyclin D1, Phospho-Rb, cyclin E and GAPDH **(B)**. **(C)** HEK293-MycER<sup>Tam</sup> cells were induced for the indicated time points and fold DNA enrichment of c-Myc and Max over IgG control was measured by ChIP-qPCR. **(D)** qRT-PCR analysis was performed to measure the ODC and TIMM 13 transcripts by enforced expression of c-Myc. Data shown in **(C)** and **(D)** are mean ± SD of three independent experiments. The *number* sign indicates statistically significant difference at  $p < 0.01$ .

**Supplementary Figure S2.** Kinetics of pre-RC proteins recruitment at control non-ORI LB2-P region and enrichment of nascent strands at MCM4 non-ORI control region. **(A)** ChIP-qPCR analysis of HEK293 cells harvested during late G<sub>1</sub> and S phase was performed to show the recruitment kinetics of indicated proteins over IgG control for LB2 ORI. **(B)** ChIP-qPCR analysis HEK293 cells harvested during G<sub>1</sub> and S phase showed the recruitment kinetics of indicated proteins over IgG control for non-ORI LB2-P region. **(C)** Recruitment kinetics of c-Myc measured by ChIP-qPCR at different phases of HEK293 cells transfected either with Vector control or Myc shRNA. **(D)** HEK293 cells transfected either with Vector control or Myc shRNA were western blotted for protein levels of c-Myc, MCM4 and GAPDH. **(E)** The nascent DNA template of 1.0 kb and 1.5 kb were isolated from either vector control or Myc shRNA transfected HEK293 cells and subjected to qPCR with MCM4 ORI and MCM4 non-ORI primers. The values obtained were normalized with non-ORI primer amplification. Except **(D)**, the data shown are mean ± SD of three independent experiments. The *asterisk* and *number* sign indicates statistically significant difference at  $p < 0.05$  and  $p < 0.01$  respectively.

**Supplementary Figure S3.** Flow cytometry and MNase CHART-PCR of HeLa cells released from mitotic arrest (M). **(A and B)** The raw data set showing MNase CHART-PCR analysis of HEK293 cells at different phases of cell cycle (G<sub>0</sub> - G<sub>1</sub>) amplified either by LB2 ORI **(A)** or E-box **(B)** regions. The C<sub>t</sub> values obtained were converted to DNA concentrations using the standard curve equation mentioned above of each primer and normalized for input variations. **(C and D)** HeLa cells either mitotic arrested (M) or released with fresh medium by mitotic shake-off procedure for the indicated time periods were processed for either to Flow cytometry analysis to show the distribution of cells in different phases of cell cycle **(C)** or for western blotting to show the protein levels of cyclin D1, Phospho-Rb, cyclin E and GAPDH **(D)**. **(E)** MNase CHART-PCR analysis of mononucleosomal DNA obtained by complete MNase digestion of HeLa cells during M- G<sub>1</sub> progression. Data shown in **(E)** is mean ± SD of three independent experiments. The *number* sign indicates statistically significant difference at  $p < 0.01$ . **(A and B)** represents single raw data set, out of the triplicates used in MNase CHART-PCR analysis of HEK293 cells.

**Supplementary Figure S4.** Kinetics of acetylase recruitment and histone tail modifications at non-ORI LB2-P region. (A and B) The G<sub>0</sub>/G<sub>1</sub> staged HEK293 cells were subjected to ChIP-qPCR and the fold DNA enrichment of non-ORI LB2-P region over IgG control was measured for GCN5, p300, HBO1 and TRRAP proteins (A) as well as for histone H3 K9Ac, H4 tetra-Ac and H3 K4me3 (B). (C) HEK293 cells either transfected with vector control or Myc shRNA were processed for western blotting to show the expression of indicated proteins. (D) HEK293-MycER<sup>Tam</sup> cells were induced for the indicated time points and fold DNA enrichment of HBO1 and histone H4 tetra-Ac over IgG control was measured by ChIP-qPCR for E-box region. Except (C), data shown are mean ± SD of three independent experiments.

**Supplementary Figure S5.** Sequential order of molecular events at both ORI and E-box regions during early to mid G<sub>1</sub> phases. (A) Fold DNA enrichment of MLL1 over IgG control was measured by ChIP-qPCR for non-ORI LB2-P region in G<sub>0</sub>/G<sub>1</sub> transiting HEK293 cells (B and C) HEK293 cells transfected with either vector control or Myc shRNA were processed for the following experiments. Cells were proceeded for ChIP-qPCR for both LB2 ORI and E-box regions to show the fold DNA enrichment of histone H3K4me3 over IgG control (B). Cell lysates were prepared for western blotting to show the expression of indicated proteins (C). (D and E) HEK293 cells progressing from early to mid G<sub>1</sub> were harvested at the indicated time points and ChIP-qPCR was performed for either LB2 ORI (D) or E-box regions (E) by immunoprecipitating the cell lysate with the indicated antibodies. (F) ChIP-qPCR was performed with MCM4 ORI primer to measure TET2 and TDG occupancy over IgG control during G<sub>0</sub> and G<sub>1</sub> phases of HEK293 cells. Except (C), data shown are mean ± SD of three independent experiments. The *number* sign indicates statistically significant difference at  $p < 0.01$ .

**Supplementary Figure S6.** Methylation profiling for E-box adjacent region of lamin B2 origin. Genomic DNA isolated from G<sub>0</sub> and early G<sub>1</sub> phased HEK293 cells were modified by bisulfite treatment. The lamin B2 origin region adjacent to E-box element (4217 to 4228, GenBank<sup>TM</sup> accession no. M94363) was sequenced after treatment and compared with that of unmodified lamin B2 origin (before bisulfite treatment). The unmethylated cytosines (Cs) were converted to thymines (Ts) upon bisulfite treatment and marked as '+', whereas methylated Cs remained unchanged due to its resistance to such conversion. The methylated CpG is denoted by upward triangle (blue).

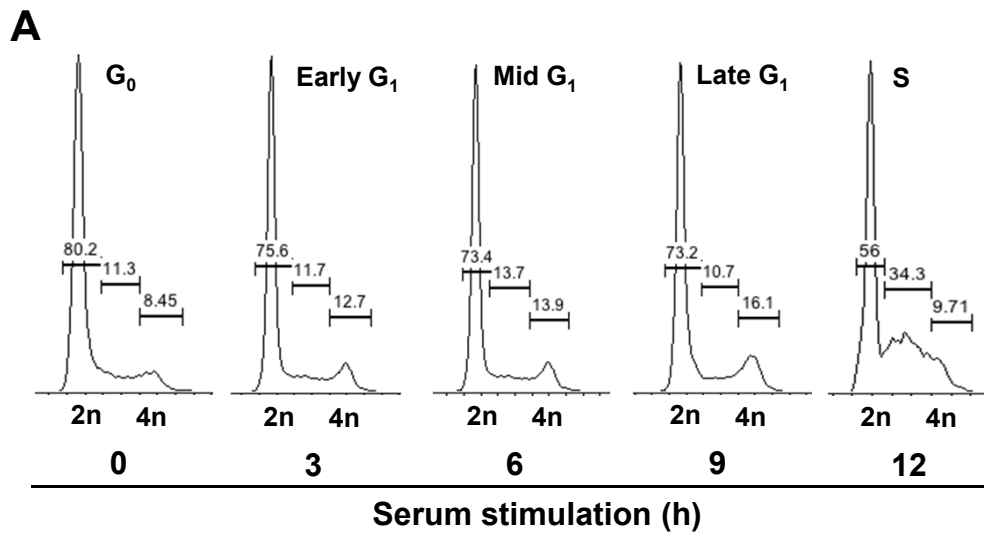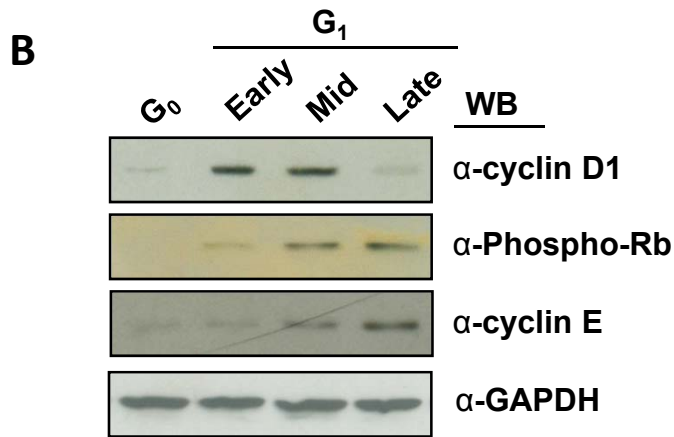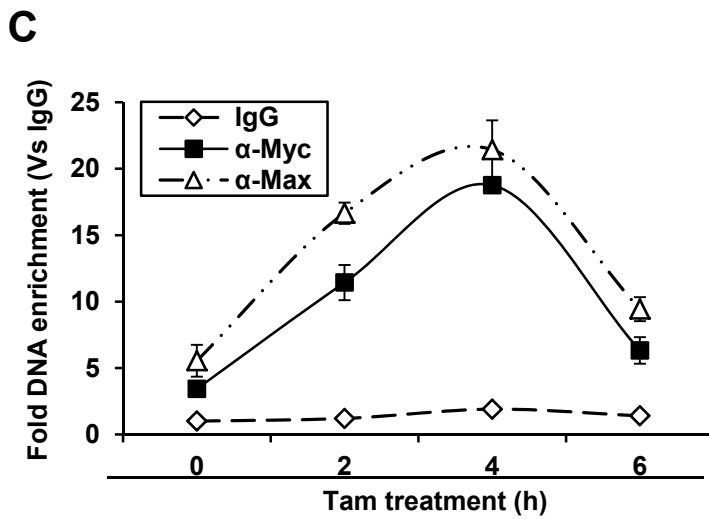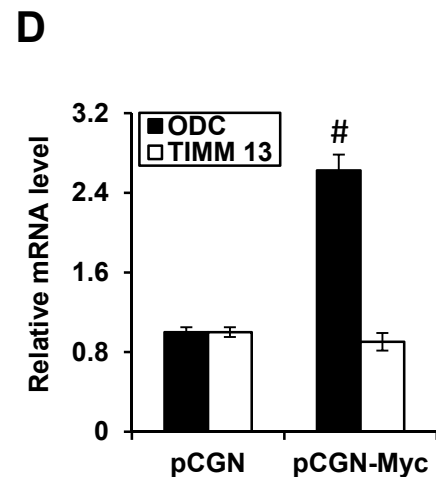



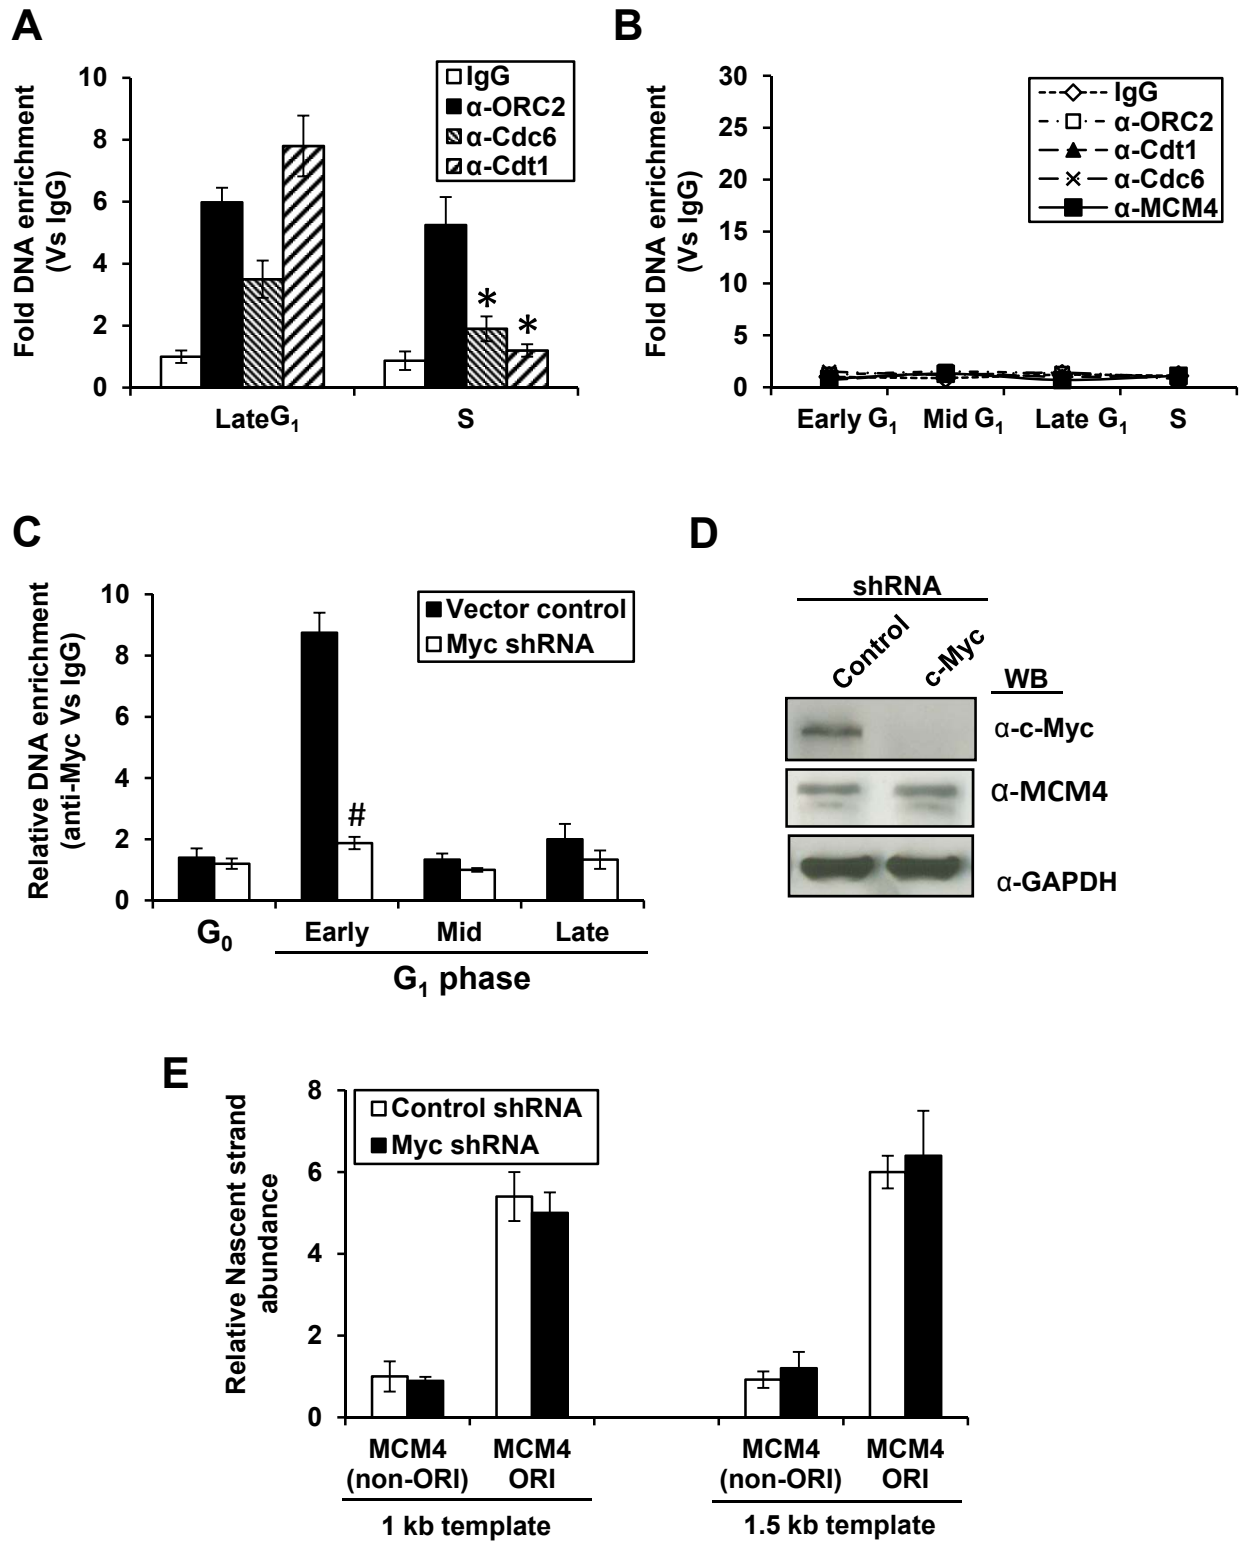

**A**

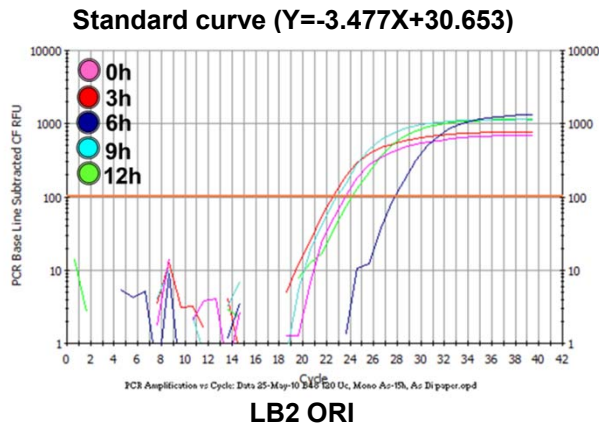

**B**

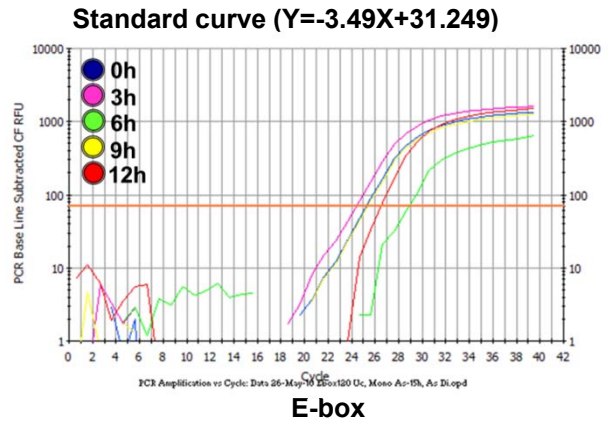

**C**

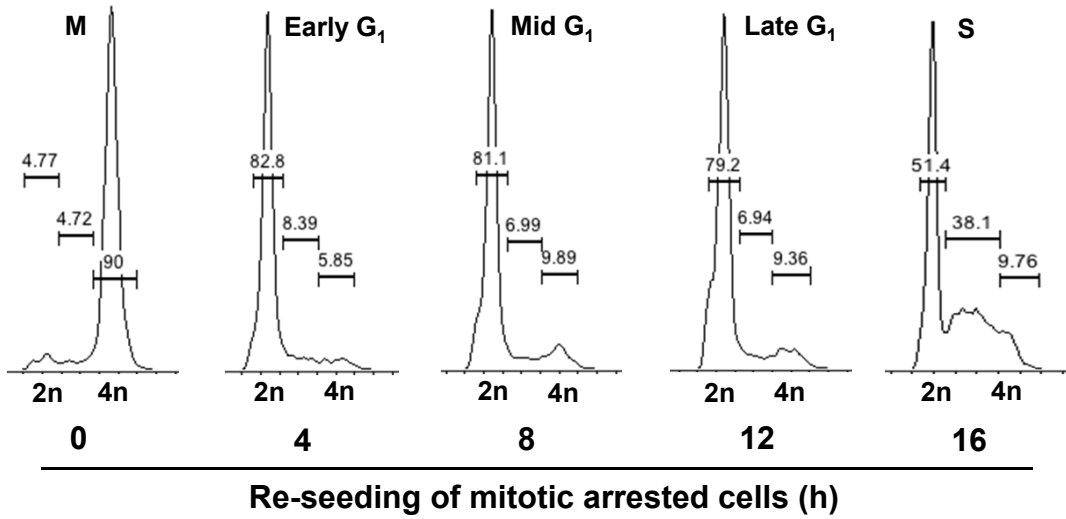

**D**

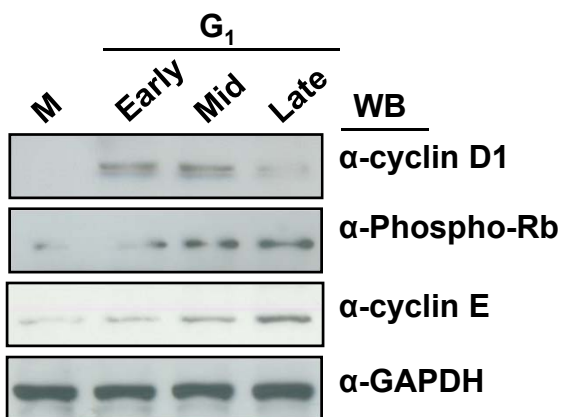

**E**

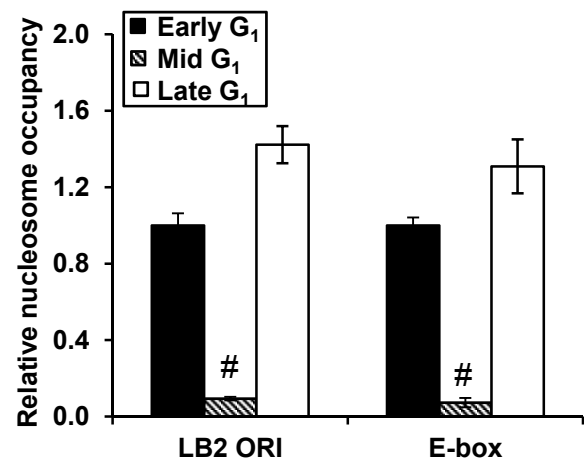

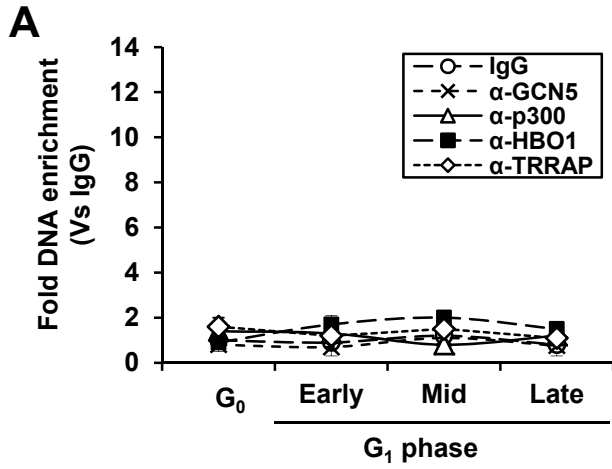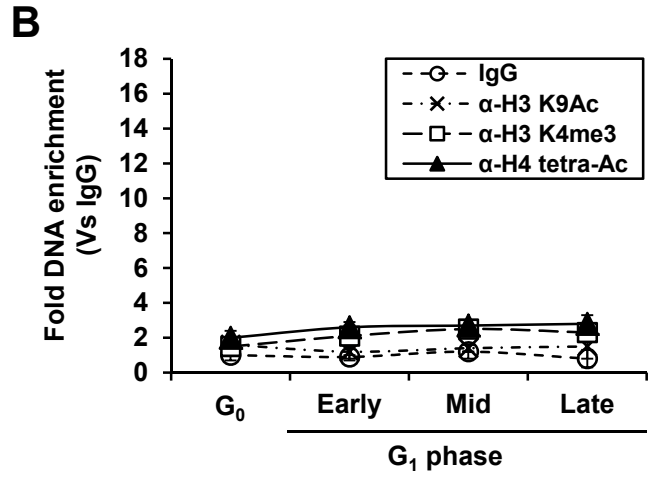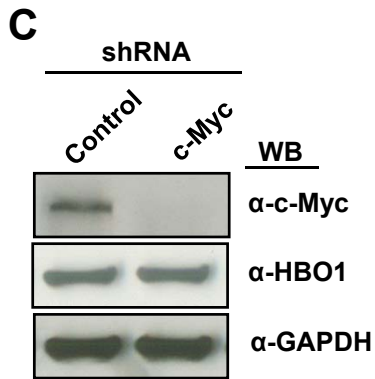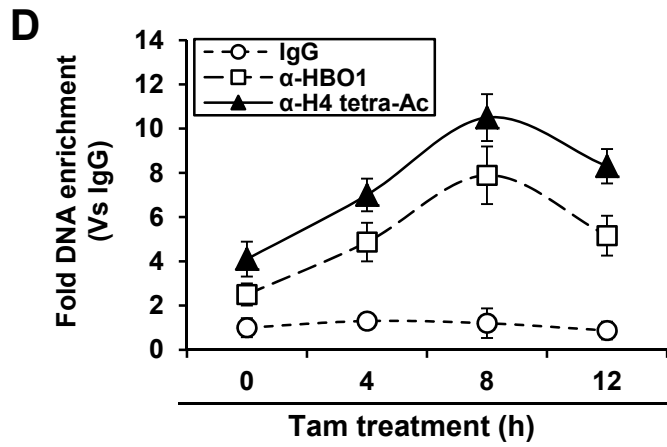

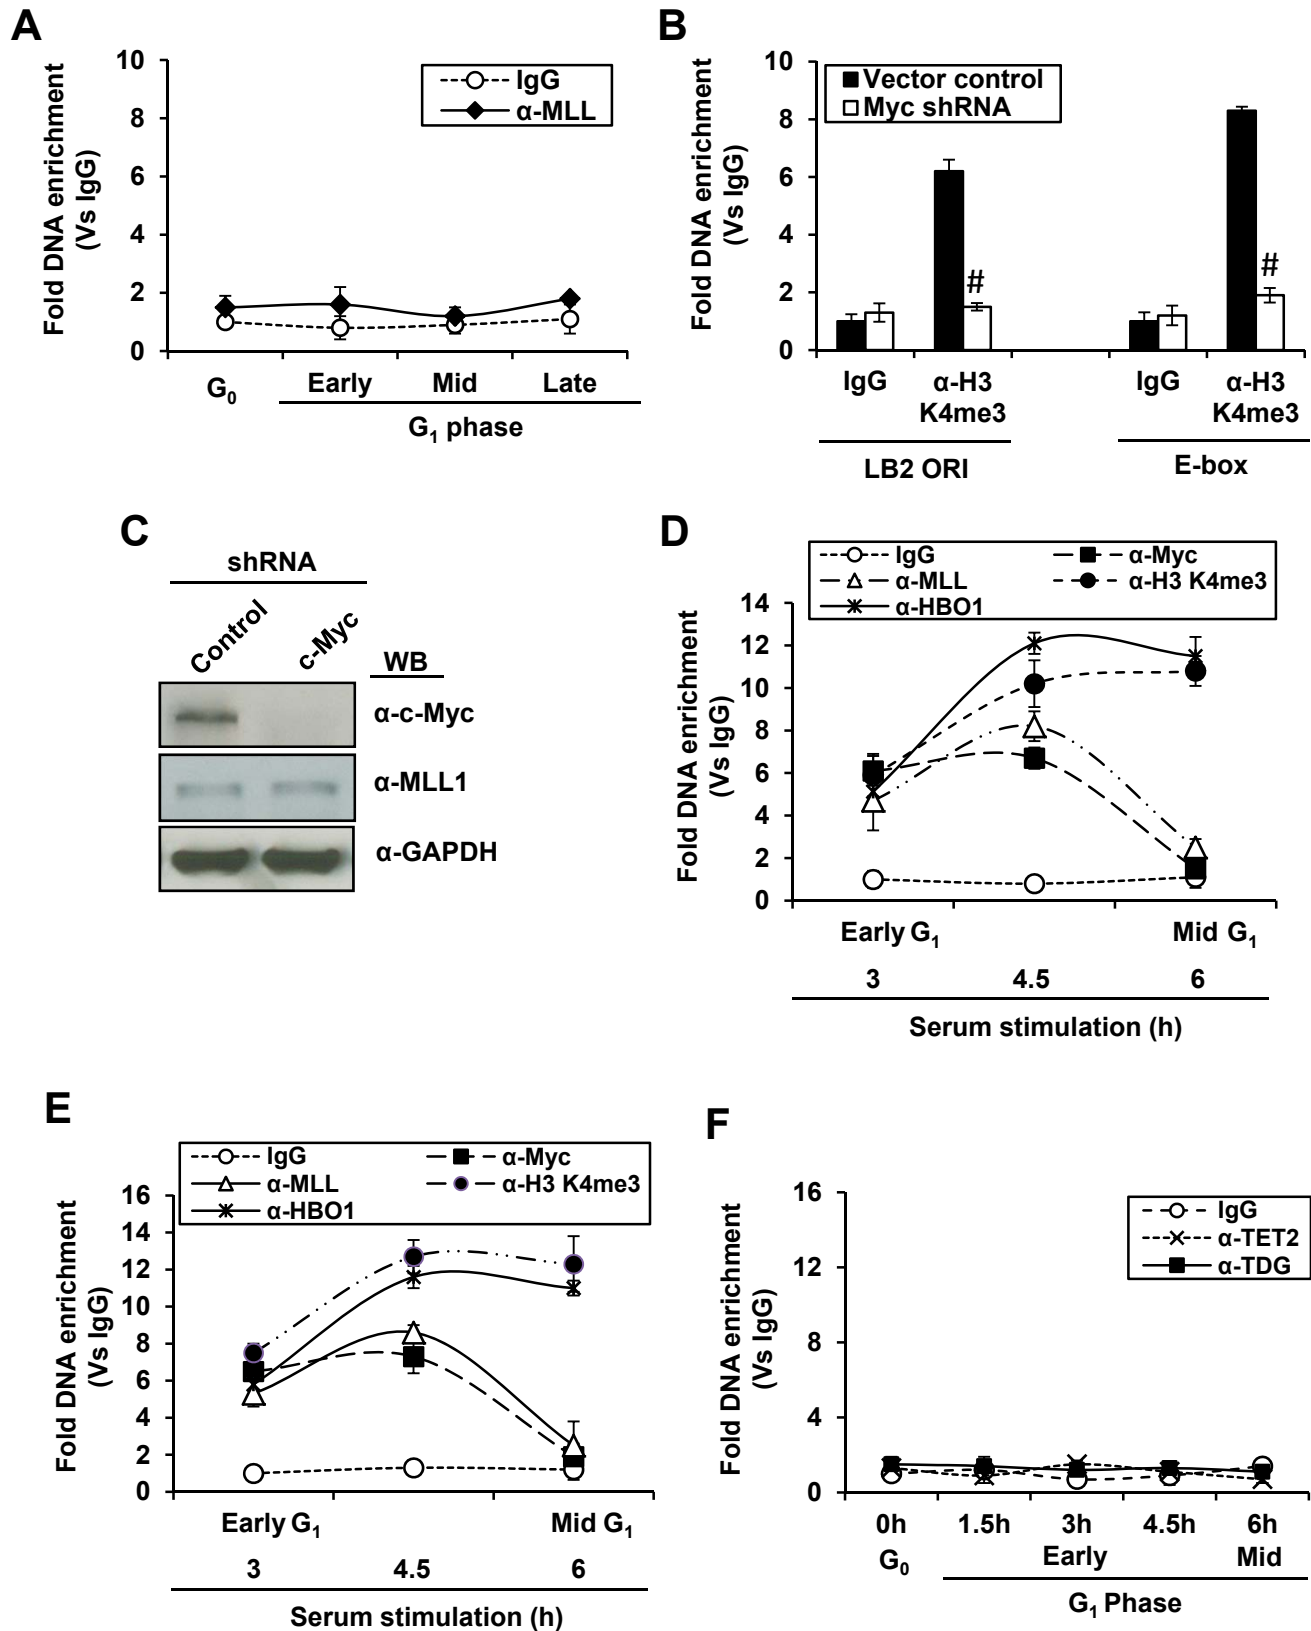

Before BS Treatment

4127 GGCGGCAACACG 4228

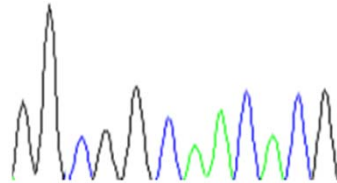

After BS Treatment

G<sub>0</sub>: GG△CGG+ + △ACG

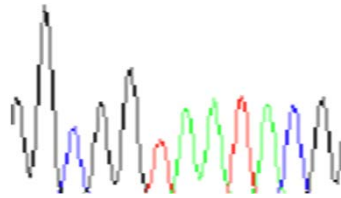

Early G<sub>1</sub>: GG△CGG+ + △ACG

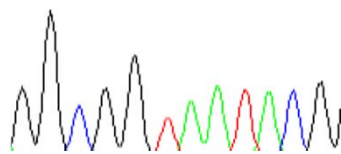

+ C to T conversion by BS treatment  
△ Methylated CpG
